# Supplementary material
Source: publisher figshare collection journal article supplement (https://tandf.figshare.com/ndownloader/files/34512919)
Supplement: Supplementary file 1 [file 34512919]

**Supplemental Materials**

Supplementary Figure 1


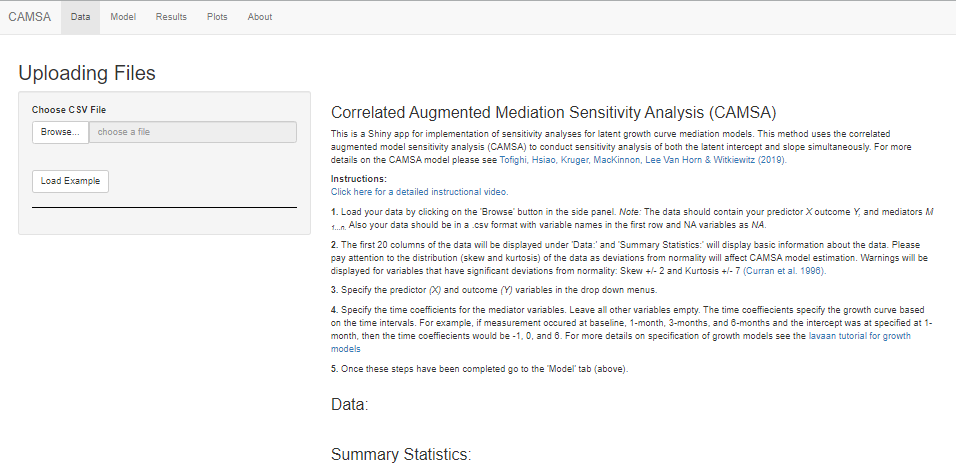


Supplementary Figure 2


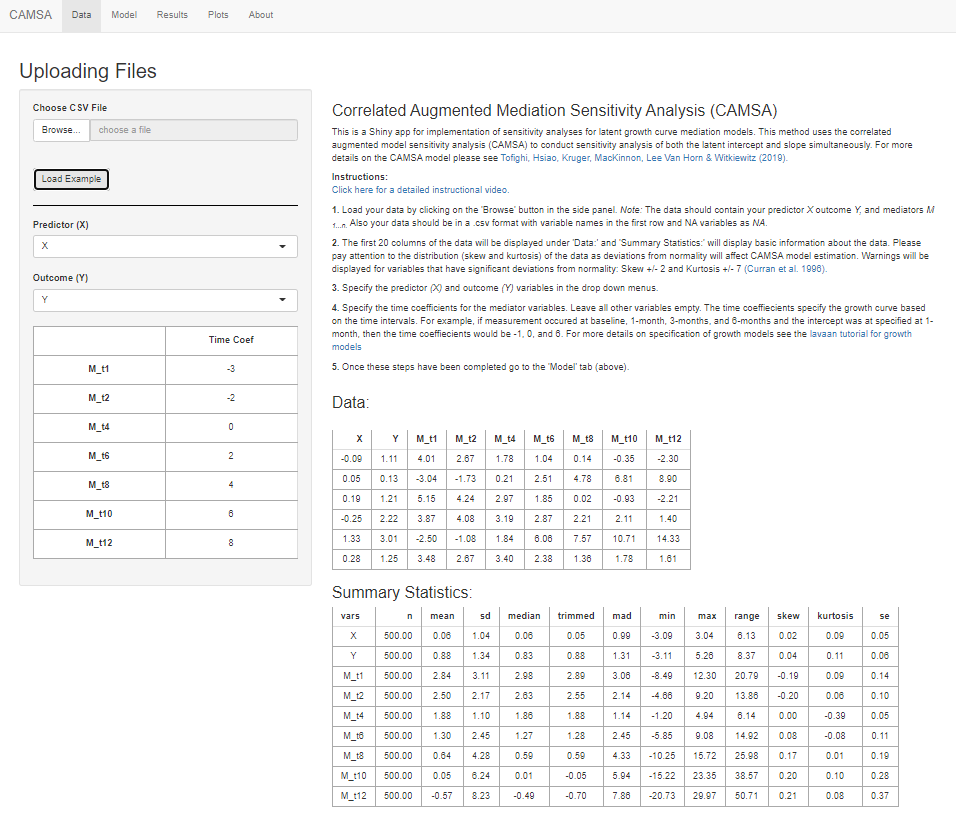


Supplementary Figure 3


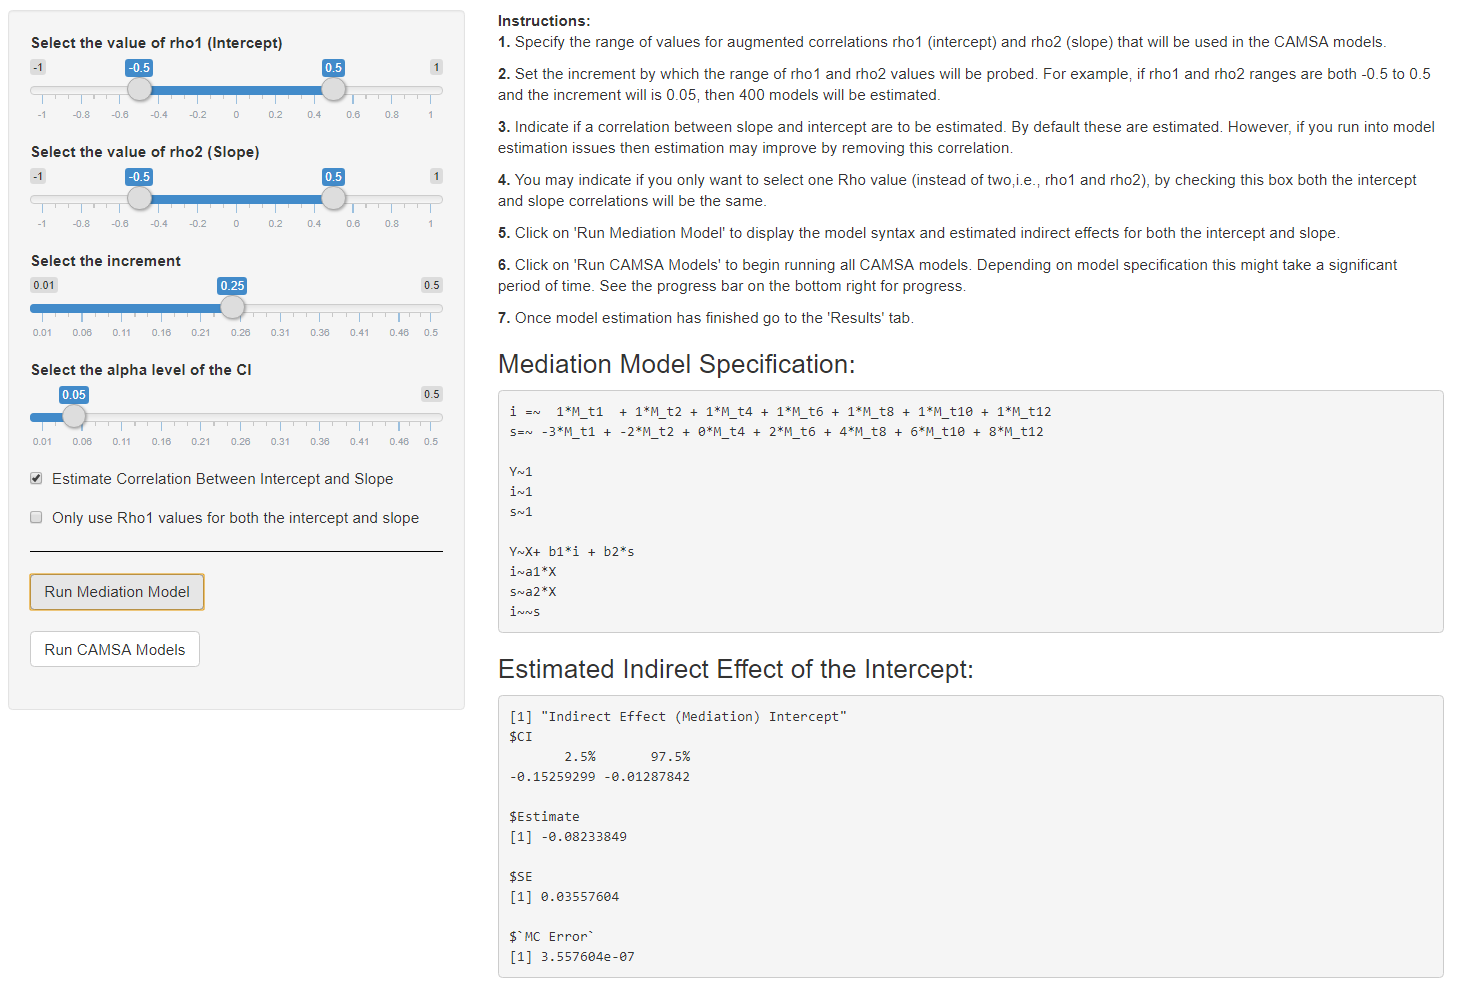


Supplementary Figure 4


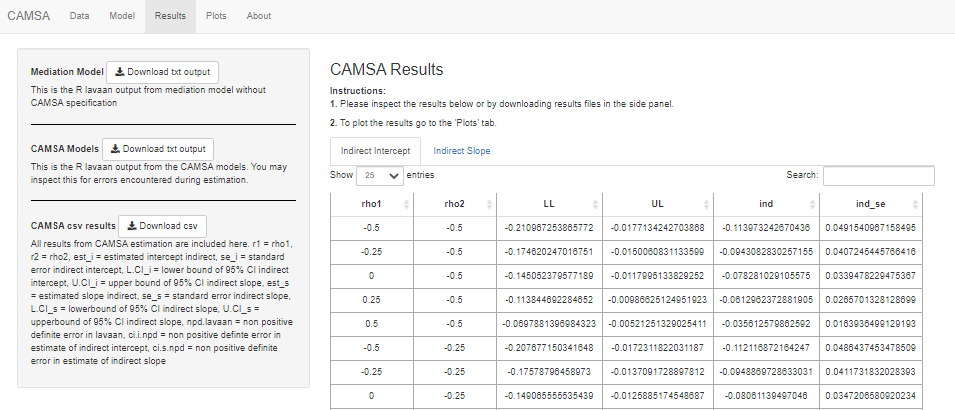


Supplementary Table 1

*CAMSA Results.csv variable definitions*

| Column | Definition |
| --- | --- |
| *Unnamed Column* | *Model Iteration # |
| r1 | *Intercept confounding correlation value |
| r2 | *Slope confounding correlation value |
| est_i | Indirect intercept estimate |
| se_i | Indirect intercept standard error |
| L.CI_i | Lower bound of the 95% of the indirect intercept |
| U.CI_i | Upper bound of the 95% of the indirect intercept |
| est_s | Indirect slope estimate |
| se_s | Indirect slope standard error |
| L.CI_s | Lower bound of the 95% of the indirect slope |
| U.CI_s | Upper bound of the 95% of the indirect slope |
| npd.lavaan | Non positive definite covariance matrices in *lavaan* estimation; TRUE = non positive definite matrices |
| ci.i.npd | Non positive definite covariance matrices in *RMediation* estimation for the indirect intercept path 95% confidence interval; TRUE = non positive definite matrices |
| ci.s.npd | Non positive definite covariance matrices in *RMediation* estimation for the indirect slope path 95% confidence interval; TRUE = non positive definite matrices |

*The values for model iteration #0 corresponding to the first row of data is the results from the latent growth mediation model without confounding correlations specified.

**Note.** If there are no values for a given combination that confounding correlation (r1 and r2 values) then a model estimation error occurred (e.g., non-convergence, non-positive definite matrices, or negative variances)
